# Supplementary material
Source: publisher figshare collection journal article supplement (https://acs.figshare.com/ndownloader/files/5906643)
Supplement: Supplementary file 1 [file 5906643]

Compound_ID	SMILES	IC50 or other compound property (optional)	Other compound property (optional)	Other compound property (optional)
5a	NC(C1=C2C(N(C3=CC=CC=C3OC)C(N2)=O)=NC(C4=CC=C(OCC)C=C4)=N1)=O	0.30 Áî 0.03
5b	NC(C1=C2C(N(C3=CC=CC=C3OC)C(N2)=O)=NC(C4=CC=C(O)C=C4)=N1)=O	5.80 Áî 0.13
5c	NC(C1=C2C(N(C3=CC=CC=C3OC)C(N2)=O)=NC(C4=CC=C(OCCCC)C=C4)=N1)=O	4.66 Áî 0.05
5d	NC(C1=C2C(N(C3=CC=CC=C3OC)C(N2)=O)=NC(C4=CC=C(OCCCCCC)C=C4)=N1)=O	> 5.0
5e	NC(C1=C2C(N(C3=CC=CC(C(OC)=O)=C3)C(N2)=O)=NC(C4=CC=C(OCC)C=C4)=N1)=O	0.19 Áî 0.02
5f	NC(C1=C2C(N(C3=CC=C(C(OC)=O)C=C3)C(N2)=O)=NC(C4=CC=C(OCC)C=C4)=N1)=O	4.73 Áî 0.16
5g	NC(C1=C2C(N(C3=CC=CC(C(OC)=O)=C3)C(N2)=O)=NC(C4=CC=C(C5=CC=CC=C5)C=C4)=N1)=O	> 20.0
6e	NC(C1=C2C(N(C3=CC=CC(C(O)=O)=C3)C(N2)=O)=NC(C4=CC=C(OCC)C=C4)=N1)=O	7.91 Áî 0.18
7	NCCCCCCCCCCNC(OC(C)(C)C)=O
8	NC(C1=C2C(N(C3=CC=CC(C(NCCCCCNC(OC(C)(C)C)=O)=O)=C3)C(N2)=O)=NC(C4=CC=C(OCC)C=C4)=N1)=O	> 10.0
9	NC(C1=C2C(N(C3=CC=CC(C(NCCCCCNC(CCCC[C@@H]4SC[C@@](N5)([H])[C@]4([H])NC5=O)=O)=O)=C3)C(N2)=O)=NC(C6=CC=C(OCC)C=C6)=N1)=O	26.3 Áî 0.3
